# Supplementary material
Source: publisher figshare collection journal article supplement (https://sage.figshare.com/ndownloader/files/17763257)

Appendix 4: Residual plots for the regression of SRV on SRF

A

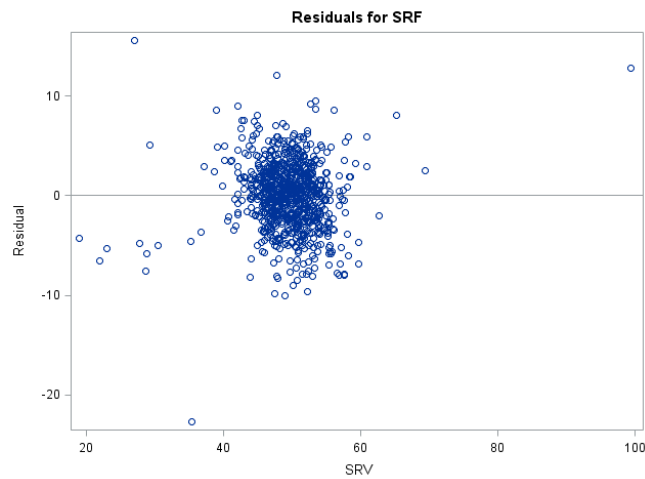

B

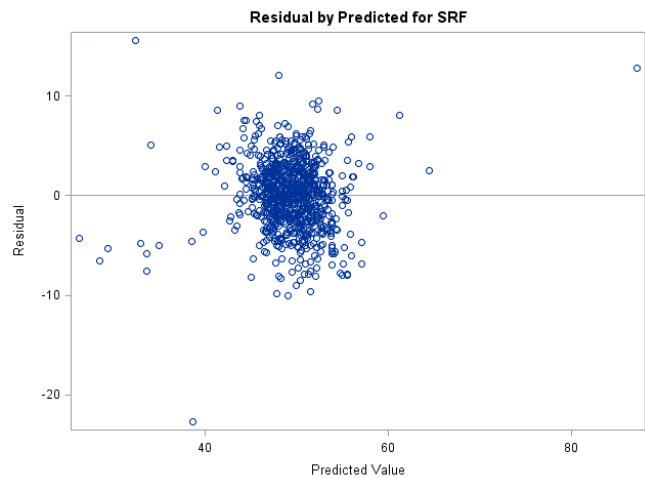

Supplement: Supplementary file 1 [file 17763257]
